# Supplementary material for: Chemomechanics in Ni–Mn binary cathode for advanced sodium-ion batteries
Source: Royal Society of Chemistry journal article supplement (doi:10.1039/d1ta05850a), 2021-01-01
Supplement: d1ta05850a1.pdf [file d1ta05850a1.pdf]

**Electronic Supporting Information (ESI)**

**Chemomechanics in Ni–Mn Binary Cathode for Advanced Sodium-Ion Batteries**

Hyungjun Kim<sup>a‡</sup>, Myungkyu Kim<sup>a‡</sup>, Shidong Park<sup>a</sup>, Maenghyo Cho<sup>a\*</sup> and Duho Kim<sup>b\*</sup>

---

<sup>a</sup> Department of Mechanical Engineering, Seoul National University, 1 Gwanak-ro, Gwanak-gu, Seoul 08826, Republic of Korea.

E-mail: mhcho@snu.ac.kr

<sup>b</sup> Department of Mechanical Engineering (Integrated Engineering Program), Kyung Hee University, 1732, Deogyong-daero, Giheung-gu, Yongin-si, Gyeonggi-do, 17104, Republic of Korea

E-mail: duhokim@khu.ac.kr

<sup>‡</sup> These authors contributed equally

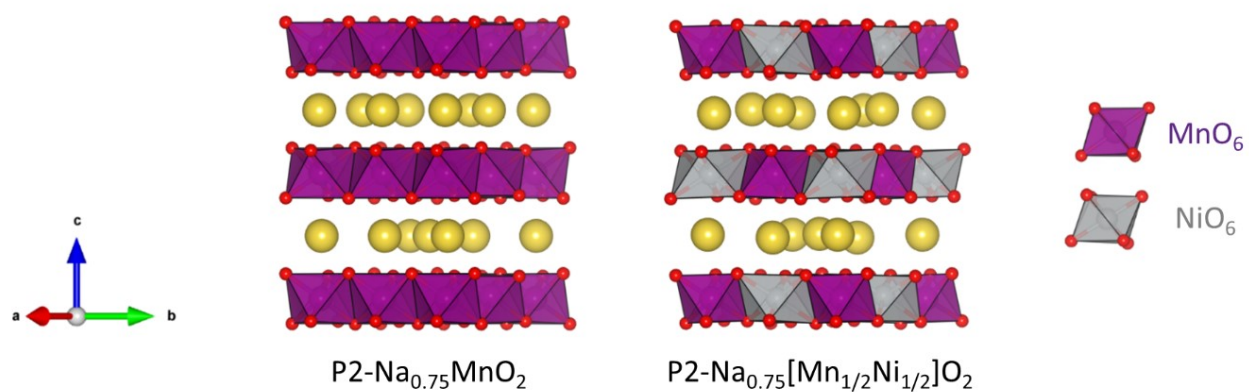

**Figure S1.** The atomic structures of  $\text{P2-Na}_{0.75}\text{MnO}_2$  (left) and  $\text{Na}_{0.75}[\text{Mn}_{1/2}\text{Ni}_{1/2}]\text{O}_2$  (right). TM layers in  $\text{Na}_{0.75}\text{MnO}_2$  and  $\text{Na}_{0.75}[\text{Mn}_{1/2}\text{Ni}_{1/2}]\text{O}_2$  are constituted by  $\text{MnO}_6$  (purple octahedra) and  $\text{MnO}_6/\text{NiO}_6$  (gray octahedra), respectively.

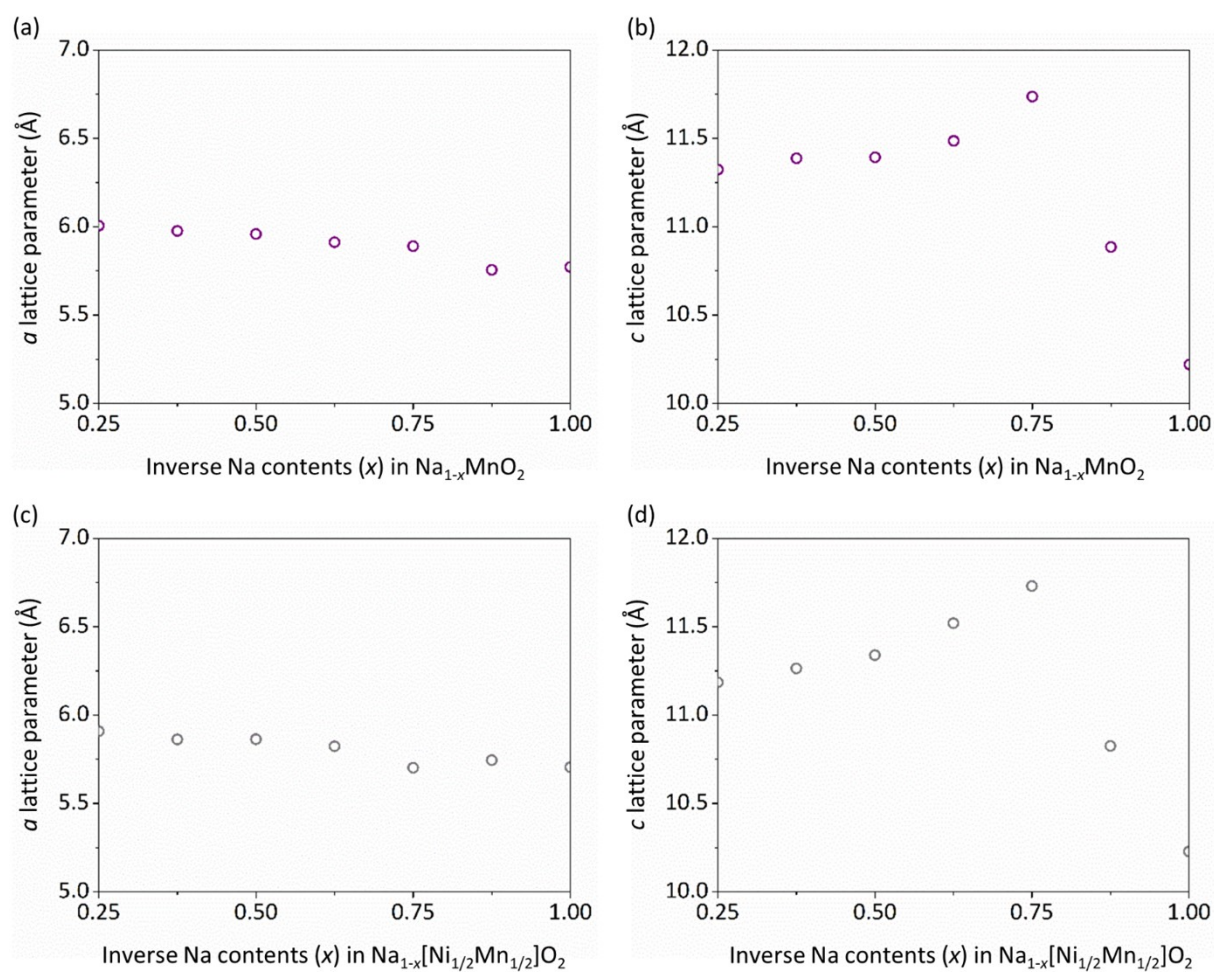

**Figure S2.** Calculated  $a$  and  $c$  lattice parameters with varying vacancy content ( $x$ ) in (a-b)  $\text{Na}_{1-x}\text{MnO}_2$  and (c-d)  $\text{Na}_{1-x}[\text{Ni}_{1/2}\text{Mn}_{1/2}]\text{O}_2$  over the full range ( $0.25 \leq x \leq 1.0$ ).  $a$  lattice parameters were calculated based on the average values of  $a$  and  $b$  lattice parameters at each vacancy content.

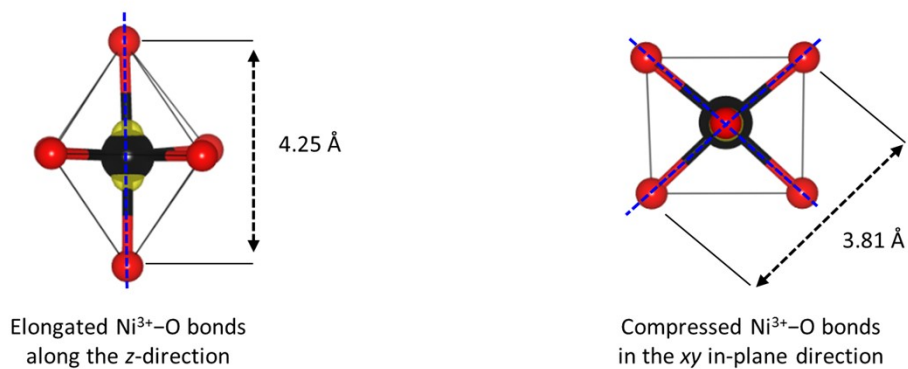

**Figure S3.** Ni<sup>3+</sup>O<sub>6</sub> representing Ni<sup>3+</sup>O<sub>6</sub> octahedra in Na<sub>0.5</sub>[Mn<sub>1/2</sub>Ni<sub>1/2</sub>]O<sub>2</sub>. The electron densities around Ni<sup>3+</sup> atom are drawn in yellow. The spatial electron densities surrounding oxygen atoms are omitted. Blue dashed lines indicate the direction of O-Ni<sup>3+</sup>-O configurations consisting of Ni<sup>3+</sup>O<sub>6</sub>. The long O-Ni<sup>3+</sup>-O bond (left) shows the elongation of Ni<sup>3+</sup>-O bonds along z-direction, whereas short ones (right) does the compression of Ni<sup>3+</sup>-O bonds in the xy in-plane direction (right).

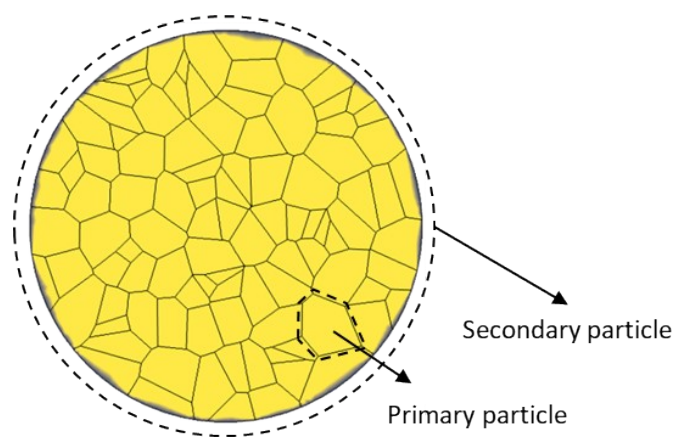

**Figure S4.** Illustration of primary and secondary particles.

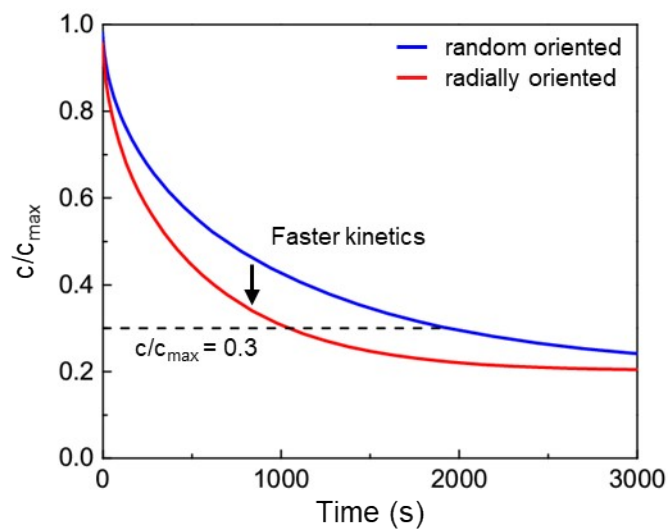

**Figure S5.** Na ions concentration change over time for the randomly oriented (blue) and the radially oriented (red) secondary particle during desodiation.

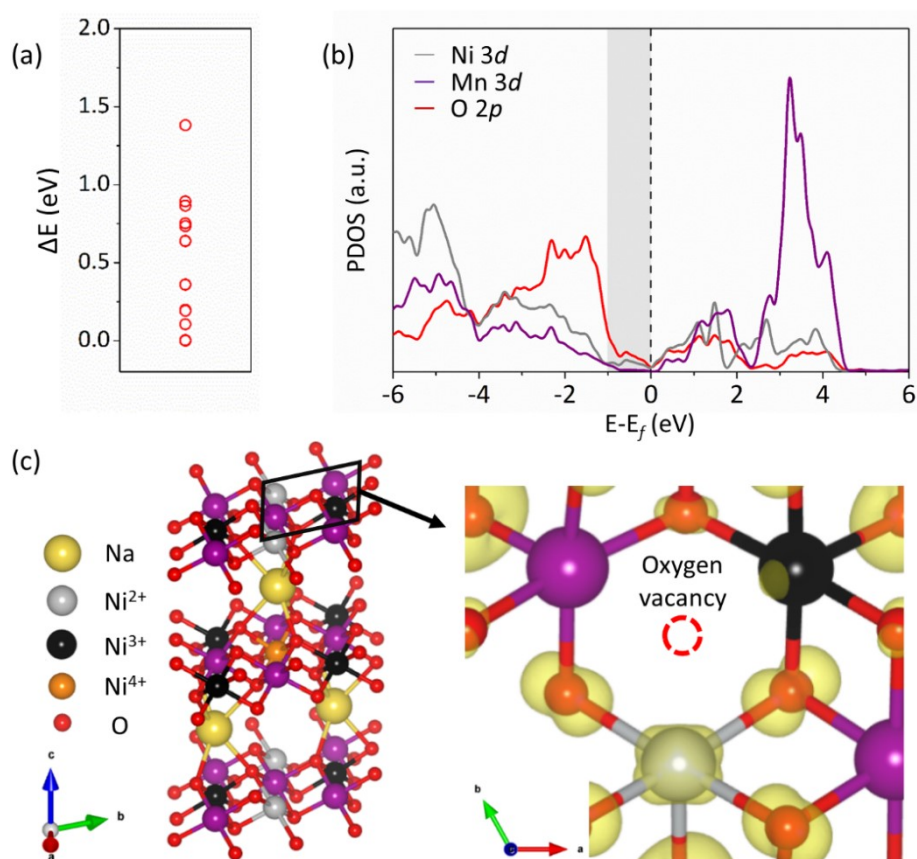

**Figure S6.** (a) The energy configuration of  $\text{Na}_{0.25}[\text{Mn}_{1/2}\text{Ni}_{1/2}]\text{O}_2$  with an oxygen vacancy ( $\text{Na}_{0.25}[\text{Mn}_{1/2}\text{Ni}_{1/2}]\text{O}_{1.875}$ ) corresponding to the high-voltage phase.<sup>1</sup> Based on the  $\text{Na}_{0.25}[\text{Mn}_{1/2}\text{Ni}_{1/2}]\text{O}_{1.875}$  with the lowest formation energy, we constructed (b) combined graphs of PDOSs of Mn (purple) and Ni (gray) 3d-electron and O (red) 2p-electron and (c) calculated the spatial electron densities (yellow iso-surface) at  $-1.0 \leq E-E_f \leq 0.0$ . Red dashed circle highlights that  $\text{Ni}^{3+}$  and  $\text{Ni}^{4+}$  ions in  $\text{Na}_{0.25}[\text{Mn}_{1/2}\text{Ni}_{1/2}]\text{O}_2$  are reduced to the  $\text{Ni}^{2+}$  and  $\text{Ni}^{3+}$ , respectively, as oxygen vacancy is introduced.

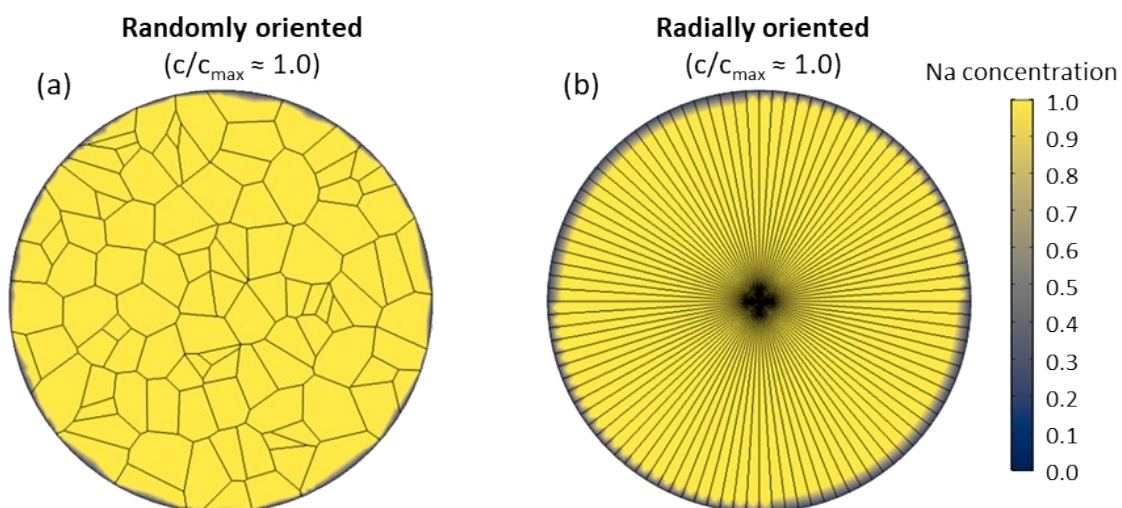

**Figure S7.** Concentration of Na ions for (a) the randomly oriented and (b) the radially oriented shape secondary particles at  $c/c_{\max} \approx 1.0$ .



| Parameter                                           | Value                                 |          |
|-----------------------------------------------------|---------------------------------------|----------|
| Particle radius                                     | 5 $\mu\text{m}$                       |          |
| Maximum Na concentration                            | 58418 mol/m <sup>3</sup>              |          |
| Na diffusivity along <i>the ab</i> plane            | 7x10 <sup>-15</sup> m <sup>2</sup> /s |          |
| Na diffusivity along <i>the c</i> lattice direction | 7x10 <sup>-16</sup> m <sup>2</sup> /s |          |
| Elastic constants                                   | C <sub>11</sub>                       | 222 GPa  |
|                                                     | C <sub>12</sub>                       | 77 GPa   |
|                                                     | C <sub>13</sub>                       | 36 GPa   |
|                                                     | C <sub>33</sub>                       | 245 GPa  |
|                                                     | C <sub>44</sub>                       | 26 GPa   |
|                                                     | C <sub>66</sub>                       | 72.5 GPa |

**Table S1.** Parameters used in the finite element analysis.

## References

- 1 D. Kim and J. Lee, *Chem. Mater.*, 2020, **32**, 5541–5549.
